# Supplementary material
Source: PubMed Central journal article supplement (PMC5207237)
Supplement: 10.1074_M116.740795_jbc.M116.740795-1.pdf [file 10.1074_M116.740795_jbc.M116.740795-1.pdf]

## Supplementary Information

### Extrinsic functions of lectin domains in O-GalNAc glycan biosynthesis

V. Lorenz, Y. Ditamo, R.B. Cejas, M. E. Carrizo, E.P. Bennett, H. Clausen, G.A. Nores, F.J. Irazoqui

**Figure S-1:** **A:** Crystal structure of soluble human ppGalNAc-T2 (without the short N-terminal cytoplasmic tail and small transmembrane anchor) (PDB: 2FFU) visualized with VMD (<http://www.ks.uiuc.edu/Research/vmd/>). **B:** Schematic representation of recombinant constructs: soluble human ppGalNAc-Ts (catalytic and lectin domain) and soluble human lectin domains of ppGalNAc-T with N-terminal 6x-His-tag. Recombinant proteins were expressed in Sf9 insect cells as soluble molecules, and proteins were purified by affinity chromatography using  $\text{Co}^{2+}$ -charged resin. **C:** Purity of proteins was analyzed by SDS-PAGE stained with Coomassie Brilliant Blue. Enzymes and lectin domains are shown as **1:** ppGalNAc-T2, **2:** ppGalNAc-T3, **3:** dC1GalT, **4:** T2lec, **5:** T3lec and **6:** T4lec.

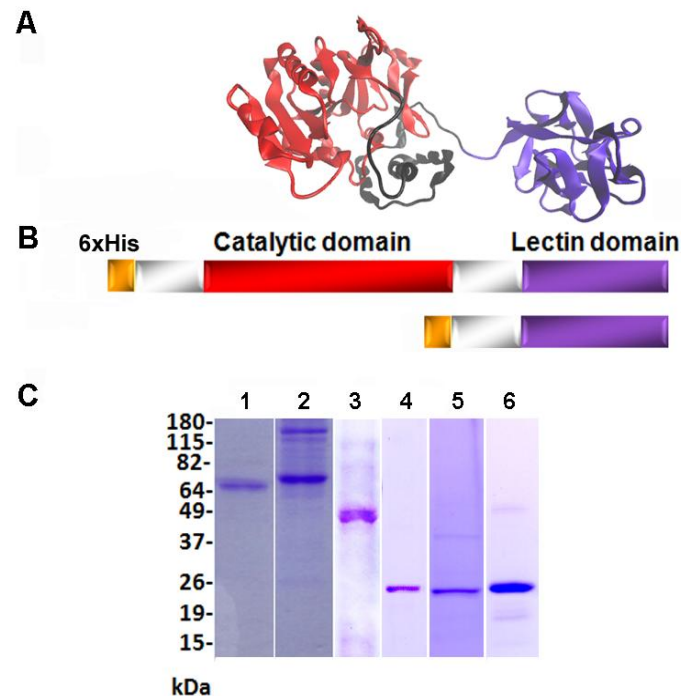

**Table S-1:** Kinetic parameters for the enzyme ppGalNAc-T2 in absence or presence of T3lec and T4lec using MUC1 and MUC2 as acceptor peptides.

| Kinetic parameters<br>(Best-fit values<br>± Std. Error) | ppGalNAc-T2/<br>MUC1 | ppGalNAc-T2/<br>MUC1<br>+T3lec | ppGalNAc-T2/<br>MUC1<br>+T4lec | ppGalNAc-T2/<br>MUC2 | ppGalNAc-T2/<br>MUC2<br>+T3lec | ppGalNAc-T2/<br>MUC2<br>+T4lec |
|---------------------------------------------------------|----------------------|--------------------------------|--------------------------------|----------------------|--------------------------------|--------------------------------|
| <i>V<sub>max</sub></i><br>(nmol/mg.min)                 | 29.8 ± 2.8           | 14.2 ± 2.1                     | 28.4 ± 4.5                     | 106.2 ± 3.4          | 79 ± 13                        | 98 ± 13                        |
| <i>K<sub>m</sub></i><br>(μM)                            | 0.28 ± 0.10          | 0.32 ± 0.18                    | 0.55 ± 0.28                    | 0.067 ± 0.010        | 0.231 ± 0.080                  | 0.094 ± 0.035                  |

**Figure S-2:** Kinetics plots of MUC2 peptide glycosylation assay under initial velocity condition of ppGalNAc-T2 enzymatic reaction (black). Effects of T3lec (**A**, blue) and T4lec (**C**, red) on ppGalNAc-T2 activity. Plots were fitted to Michaelis-Menten equation using GraphPad software program yielding  $R^2$ : 0.99 (black), 0.97 (blue) and 0.94 (red). Double reciprocal plots of enzyme activity without lectin domain (black) or in the presence of 0.16  $\mu\text{M}$  T3lec (**B**) or T4lec (**D**) indicated the type of inhibition of ppGalNAc-T2 activity. Plots were fitted to linear regression using GraphPad software program yielding  $R^2$ : 0.99 (black), 0.99 (blue) and 0.99 (red).

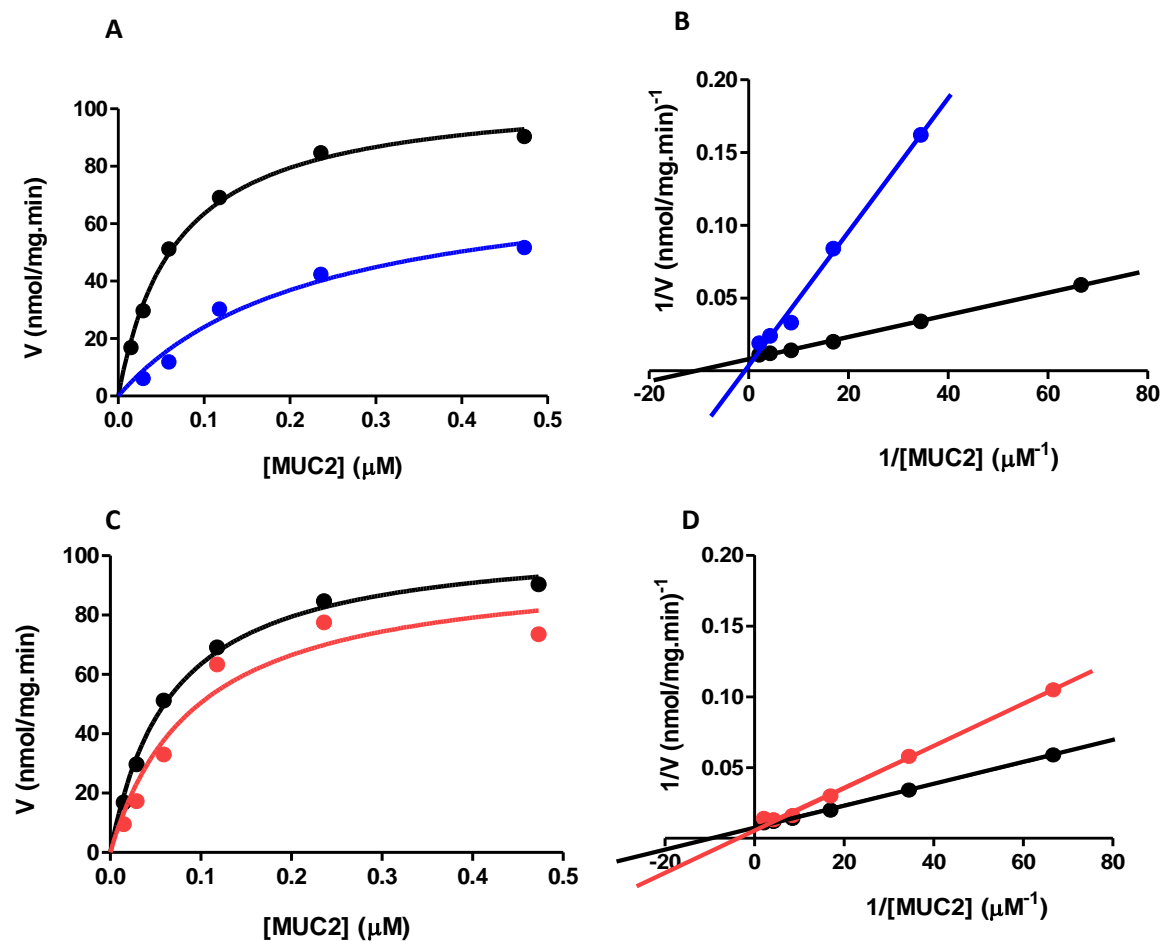

**Table S-2:** Kinetic parameters for the enzyme ppGalNAc-T3 in absence or presence of T3lec using MUC1 and MUC2 as acceptor peptides.

| <b>Kinetic parameters<br/>(Best-fit values ±<br/>Std. Error)</b> | <b>ppGalNAc-T3/<br/>MUC1</b> | <b>ppGalNAc-T3/<br/>MUC1<br/>+T3lec</b> | <b>ppGalNAc-T3/<br/>MUC2</b> | <b>ppGalNAc-T3/<br/>MUC2<br/>+T3lec</b> |
|------------------------------------------------------------------|------------------------------|-----------------------------------------|------------------------------|-----------------------------------------|
| <b><i>V</i><sub>max</sub><br/>(nmol/mg.min)</b>                  | <b>2.95 ± 0.58</b>           | <b>2.07 ± 0.35</b>                      | <b>25.7 ± 3.3</b>            | <b>24.1 ± 9.1</b>                       |
| <b><i>K</i><sub>m</sub><br/>(μM)</b>                             | <b>0.36 ± 0.22</b>           | <b>0.68 ± 0.30</b>                      | <b>0.183 ± 0.088</b>         | <b>1.40 ± 0.81</b>                      |



**Table S-3:** Determination of inhibition constants of T3lec and T4lec on the enzyme activity of ppGalNAc-T2 with MUC1 and MUC2 as acceptor peptides.

| Inhibitory Characteristics (mean $\pm$ Std. error) | T3lec on MUC1/ ppGalNAc-T2 | T4lec on MUC1/ ppGalNAc-T2 | T3lec on MUC2/ ppGalNAc-T2 | T4lec on MUC2/ ppGalNAc-T2 |
|----------------------------------------------------|----------------------------|----------------------------|----------------------------|----------------------------|
| Type of inhibition                                 | Non-competitive            | Competitive                | Competitive                | Competitive                |
| <i>K<sub>i</sub></i>                               | -                          | 0.17 $\pm$ 0.10            | 0.065 $\pm$ 0.024          | 0.40 $\pm$ 0.16            |
| <i>K<sub>i</sub>'</i> ( $\mu$ M)                   | 0.146 $\pm$ 0.025          | -                          | -                          | -                          |

**Table S-4:** Determination of inhibition constants of T3lec on the ppGalNAc-T3 enzyme activity with MUC1 and MUC2 as acceptor peptides.

| Inhibitory Characteristics<br>(mean $\pm$ Std. error)       | T3lec on<br>MUC1/<br>ppGalNAc-T3       | T3lec on<br>MUC2/<br>ppGalNAc-T3 |
|-------------------------------------------------------------|----------------------------------------|----------------------------------|
| Type of inhibition                                          | Mixed                                  | Competitive                      |
| <i>K<sub>i</sub></i><br><i>K<sub>i</sub>'</i><br>( $\mu$ M) | $0.047 \pm 0.037$<br>$0.188 \pm 0.049$ | $0.0120 \pm 0.0090$<br>-         |

**Table S-5:** Kinetic parameters for the *Drosophila* Core 1 Gal-T (dC1GalT) enzyme in absence or presence of T3lec using desialylated ovine submaxillary mucin (dOSM) as acceptor glycoprotein.

| Kinetic parameters<br>(Best-fit values $\pm$ Std.<br>Error) | dOSM/ dC1GalT                     | dOSM/ dC1GalT<br>+T3lec             |
|-------------------------------------------------------------|-----------------------------------|-------------------------------------|
| <b><i>V</i>max<br/>(pmol/mg.min)</b>                        | <b>20.6 <math>\pm</math> 3.6</b>  | <b>13.2 <math>\pm</math> 1.0</b>    |
| <b><i>K</i>m<br/>(<math>\mu</math>M)</b>                    | <b>1.21 <math>\pm</math> 0.45</b> | <b>0.140 <math>\pm</math> 0.040</b> |

**Table S-6:** Kinetic parameters for the dC1GalT enzyme in absence or presence of ppGalNAc-T3 using ovine submaxillary mucin (OSM) as acceptor glycoprotein.

| Kinetic parameters<br>(Best-fit values $\pm$ Std.<br>Error) | OSM/ dC1GalT                      | OSM/ dC1GalT<br>+ ppGalNAc-T3   |
|-------------------------------------------------------------|-----------------------------------|---------------------------------|
| <b><i>V</i><sub>max</sub></b><br>(pmol/mg.min)              | <b>33.1 <math>\pm</math> 2.2</b>  | <b>90 <math>\pm</math> 17</b>   |
| <b><i>K</i><sub>m</sub></b><br>( $\mu$ M)                   | <b>1.12 <math>\pm</math> 0.18</b> | <b>4.2 <math>\pm</math> 1.2</b> |

**Table S-7:** PISA analysis of ppGalNAc-T2 assembly interface (PDB: 2FFV).

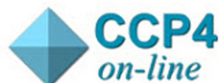

jsPISA 2.0.4 [PDB 2ffv]

## Interface B || A

### Summary

|                            | Monomer 1 |        | Monomer 2 |        |
|----------------------------|-----------|--------|-----------|--------|
| Monomer ID                 | B         |        | A         |        |
| Class                      | Protein   |        | Protein   |        |
| Symmetry operation         | X,Y,Z     |        | X,Y,Z     |        |
| Symmetry ID                | 1_555     |        | 1_555     |        |
| Interface atoms            | 181       | 4.7%   | 187       | 4.8%   |
| Surface atoms              | 2073      | 53.7%  | 2097      | 53.5%  |
| Total atoms                | 3859      | 100.0% | 3921      | 100.0% |
| Interface residues         | 55        | 11.4%  | 58        | 11.9%  |
| Surface residues           | 442       | 91.9%  | 445       | 91.0%  |
| Total residues             | 481       | 100.0% | 489       | 100.0% |
| BSA, Å <sup>2</sup>        | 1688.0    | 7.9%   | 1691.3    | 7.7%   |
| ASA, Å <sup>2</sup>        | 21334.0   | 100.0% | 21942.3   | 100.0% |
| Solvation energy, kcal/mol | -433.0    |        | -433.5    |        |
| SE gain, kcal/mol          | -6.0      |        | -4.8      |        |

### Interaction radar

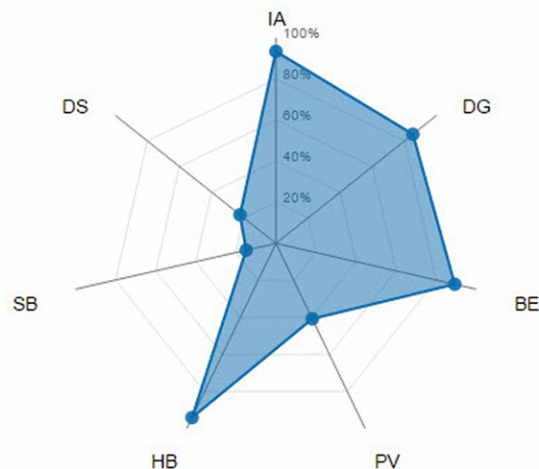

### Interface parameters

|    |                                  |        |
|----|----------------------------------|--------|
| IA | : Interface area, Å <sup>2</sup> | 1690   |
| DG | : Solvation Energy, kcal/mol     | -10.81 |
| BE | : Total Binding Energy, kcal/mol | -19.69 |
| PV | : Hydrophobic P-value            | 0.2327 |
| HB | : Number of Hydrogen Bonds       | 20     |
| SB | : Number of Salt Bridges         | 0      |
| DS | : Number of Disulphide Bonds     | 0      |

Radar area, exceeding the 50% border line on most points, indicates that the interface is likely to be significant for biological assembly. Interfaces with radar area, fitting within the 50% border line, are more likely to be artefacts of crystal packing.

## Interface B || A

### Hydrogen bonds

|    | Monomer 1        | Length | Monomer 2        |
|----|------------------|--------|------------------|
| 1  | B:GLN 262 [ NE2] | 3.3735 | A:GLN 511 [ OE1] |
| 2  | B:SER 267 [ OG ] | 2.5091 | A:ASP 494 [ OD2] |
| 3  | B:ALA 268 [ N ]  | 2.9122 | A:ASP 494 [ OD1] |
| 4  | B:TYR 471 [ OH ] | 3.6881 | A:CYS 473 [ O ]  |
| 5  | B:GLN 480 [ NE2] | 3.6245 | A:TYR 284 [ OH ] |
| 6  | B:HIS 492 [ NE2] | 2.6628 | A:TYR 284 [ OH ] |
| 7  | B:ASP 494 [ N ]  | 3.8026 | A:ASP 269 [ OD1] |
| 8  | B:GLN 511 [ NE2] | 2.8590 | A:GLN 262 [ OE1] |
| 9  | B:GLN 262 [ OE1] | 3.6659 | A:GLN 511 [ NE2] |
| 10 | B:TYR 263 [ O ]  | 3.6617 | A:ARG 514 [ NH2] |
| 11 | B:GLY 265 [ O ]  | 2.9381 | A:GLY 512 [ N ]  |
| 12 | B:ASP 269 [ OD1] | 3.8766 | A:ASP 494 [ N ]  |
| 13 | B:TYR 284 [ OH ] | 3.0694 | A:HIS 492 [ NE2] |
| 14 | B:TYR 284 [ OH ] | 3.7994 | A:GLN 480 [ NE2] |
| 15 | B:THR 368 [ O ]  | 3.7728 | A:HIS 462 [ ND1] |
| 16 | B:ASP 465 [ OD2] | 3.4028 | A:ASN 257 [ ND2] |
| 17 | B:CYS 473 [ O ]  | 3.4998 | A:TYR 471 [ OH ] |
| 18 | B:ASP 494 [ OD1] | 2.6624 | A:ALA 268 [ N ]  |
| 19 | B:ASP 494 [ OD2] | 2.6704 | A:SER 267 [ OG ] |
| 20 | B:GLN 511 [ OE1] | 3.4251 | A:GLN 262 [ NE2] |

### Disulphide bonds

No disulphide bonds found

### Salt bridges

No salt bridges found

### Covalent bonds

No covalent bonds found



Interface B | A

| Residue | IS | Residue  | H5 | ASA    | BSA   | Delta G |
|---------|----|----------|----|--------|-------|---------|
| 1       | B  | BLYS 74  |    | 114.62 | 0.00  | 0.00    |
| 2       | B  | BLYS 75  |    | 117.91 | 0.00  | 0.00    |
| 3       | B  | BLYS 76  |    | 45.97  | 0.00  | 0.00    |
| 4       | B  | BARG 77  |    | 155.45 | 0.00  | 0.00    |
| 5       | B  | BTRY 78  |    | 40.11  | 0.00  | 0.00    |
| 6       | B  | BPRO 79  |    | 84.78  | 0.00  | 0.00    |
| 7       | B  | BASP 80  |    | 99.30  | 0.00  | 0.00    |
| 8       | B  | BPHE 81  |    | 20.32  | 0.00  | 0.00    |
| 9       | B  | BASN 82  |    | 84.23  | 0.00  | 0.00    |
| 10      | B  | BGLM 83  |    | 44.35  | 0.00  | 0.00    |
| 11      | B  | BALA 84  |    | 123.81 | 0.00  | 0.00    |
| 12      | B  | BALA 85  |    | 65.38  | 0.00  | 0.00    |
| 13      | B  | BTRY 86  |    | 18.18  | 0.00  | 0.00    |
| 14      | B  | BVAL 87  |    | 39.58  | 0.00  | 0.00    |
| 15      | B  | BGLY 88  |    | 70.27  | 0.00  | 0.00    |
| 16      | B  | BGLY 89  |    | 78.55  | 0.00  | 0.00    |
| 17      | B  | BPHE 104 |    | 99.79  | 0.00  | 0.00    |
| 18      | B  | BASN 105 |    | 54.73  | 0.00  | 0.00    |
| 19      | B  | BGLM 106 |    | 105.76 | 0.00  | 0.00    |
| 20      | B  | BVAL 107 |    | 112.42 | 0.00  | 0.00    |
| 21      | B  | BGLM 108 |    | 57.86  | 0.00  | 0.00    |
| 22      | B  | BSER 109 |    | 0.00   | 0.00  | 0.00    |
| 23      | B  | BVAL 110 |    | 53.23  | 0.00  | 0.00    |
| 24      | B  | BLYS 111 |    | 146.00 | 0.00  | 0.00    |
| 25      | B  | BVAL 112 |    | 43.11  | 0.00  | 0.00    |
| 26      | B  | BASN 113 |    | 144.28 | 0.00  | 0.00    |
| 27      | B  | BASP 114 |    | 11.56  | 0.00  | 0.00    |
| 28      | B  | BASP 115 |    | 25.80  | 0.00  | 0.00    |
| 29      | B  | BARG 116 |    | 31.84  | 0.00  | 0.00    |
| 30      | B  | BALA 117 |    | 91.47  | 0.00  | 0.00    |
| 31      | B  | BILE 118 |    | 20.30  | 0.00  | 0.00    |
| 32      | I  | BPRO 119 |    | 77.96  | 33.41 | -0.53   |
| 33      | I  | BASP 120 |    | 56.94  | 1.59  | -0.02   |
| 34      | I  | BTRY 121 |    | 30.24  | 7.53  | 0.12    |
| 35      | B  | BVAL 122 |    | 17.39  | 0.00  | 0.00    |
| 36      | B  | BHIS 123 |    | 81.17  | 0.00  | 0.00    |
| 37      | I  | BASP 124 |    | 87.74  | 22.55 | 0.09    |
| 38      | B  | BGLM 125 |    | 68.50  | 0.00  | 0.00    |
| 39      | B  | BGLY 126 |    | 0.37   | 0.00  | 0.00    |
| 40      | B  | BTRY 127 |    | 84.78  | 0.00  | 0.00    |
| 41      | B  | BARG 128 |    | 169.89 | 0.00  | 0.00    |
| 42      | B  | BTRY 129 |    | 73.68  | 0.00  | 0.00    |
| 43      | B  | BGLM 130 |    | 165.26 | 0.00  | 0.00    |
| 44      | B  | BTRP 131 |    | 45.90  | 0.00  | 0.00    |
| 45      | B  | BARG 132 |    | 102.48 | 0.00  | 0.00    |
| 46      | B  | BVAL 133 |    | 143.47 | 0.00  | 0.00    |
| 47      | B  | BASP 134 |    | 78.04  | 0.00  | 0.00    |
| 48      | B  | BTRY 135 |    | 14.33  | 0.00  | 0.00    |
| 49      | B  | BPRO 136 |    | 37.73  | 0.00  | 0.00    |
| 50      | B  | BTRY 137 |    | 29.28  | 0.00  | 0.00    |
| 51      | B  | BSER 138 |    | 0.00   | 0.00  | 0.00    |
| 52      | B  | BVAL 139 |    | 0.00   | 0.00  | 0.00    |
| 53      | B  | BVAL 140 |    | 0.00   | 0.00  | 0.00    |
| 54      | B  | BVAL 141 |    | 0.00   | 0.00  | 0.00    |
| 55      | B  | BILE 142 |    | 0.00   | 0.00  | 0.00    |
| 56      | B  | BTRP 143 |    | 6.49   | 0.00  | 0.00    |
| 57      | B  | BTRY 144 |    | 10.66  | 0.00  | 0.00    |
| 58      | B  | BHIS 145 |    | 59.37  | 0.00  | 0.00    |
| 59      | B  | BASN 146 |    | 67.21  | 0.00  | 0.00    |
| 60      | B  | BGLM 147 |    | 25.84  | 0.00  | 0.00    |
| 61      | B  | BALA 148 |    | 8.70   | 0.00  | 0.00    |
| 62      | B  | BARG 149 |    | 27.32  | 0.00  | 0.00    |
| 63      | B  | BSER 150 |    | 3.73   | 0.00  | 0.00    |
| 64      | B  | BALA 151 |    | 3.46   | 0.00  | 0.00    |
| 65      | B  | BILE 152 |    | 1.01   | 0.00  | 0.00    |
| 66      | B  | BVAL 153 |    | 3.02   | 0.00  | 0.00    |
| 67      | B  | BTRY 154 |    | 5.98   | 0.00  | 0.00    |
| 68      | B  | BTRY 155 |    | 0.34   | 0.00  | 0.00    |
| 69      | B  | BVAL 156 |    | 0.17   | 0.00  | 0.00    |
| 70      | B  | BVAL 157 |    | 2.50   | 0.00  | 0.00    |
| 71      | B  | BSER 158 |    | 7.69   | 0.00  | 0.00    |
| 72      | B  | BVAL 159 |    | 0.00   | 0.00  | 0.00    |
| 73      | B  | BILE 160 |    | 16.64  | 0.00  | 0.00    |
| 74      | B  | BLYS 161 |    | 89.82  | 0.00  | 0.00    |
| 75      | B  | BTRY 162 |    | 35.82  | 0.00  | 0.00    |
| 76      | B  | BSER 163 |    | 3.79   | 0.00  | 0.00    |
| 77      | B  | BPRO 164 |    | 31.79  | 0.00  | 0.00    |
| 78      | B  | BPRO 165 |    | 103.90 | 0.00  | 0.00    |
| 79      | B  | BHIS 166 |    | 112.75 | 0.00  | 0.00    |
| 80      | B  | BILE 167 |    | 5.85   | 0.00  | 0.00    |
| 81      | B  | BILE 168 |    | 2.77   | 0.00  | 0.00    |
| 82      | B  | BLYS 169 |    | 100.25 | 0.00  | 0.00    |
| 83      | B  | BGLM 170 |    | 6.81   | 0.00  | 0.00    |
| 84      | B  | BILE 171 |    | 0.00   | 0.00  | 0.00    |
| 85      | B  | BILE 172 |    | 0.00   | 0.00  | 0.00    |
| 86      | B  | BILE 173 |    | 0.17   | 0.00  | 0.00    |
| 87      | B  | BVAL 174 |    | 0.00   | 0.00  | 0.00    |
| 88      | B  | BASP 175 |    | 0.13   | 0.00  | 0.00    |
| 89      | B  | BASP 176 |    | 9.87   | 0.00  | 0.00    |
| 90      | B  | BTRY 177 |    | 35.63  | 0.00  | 0.00    |
| 91      | B  | BSER 178 |    | 0.37   | 0.00  | 0.00    |
| 92      | B  | BASP 179 |    | 120.82 | 0.00  | 0.00    |
| 93      | B  | BASP 180 |    | 50.29  | 0.00  | 0.00    |
| 94      | B  | BPRO 181 |    | 64.44  | 0.00  | 0.00    |
| 95      | B  | BGLM 182 |    | 71.15  | 0.00  | 0.00    |
| 96      | B  | BASP 183 |    | 15.97  | 0.00  | 0.00    |
| 97      | B  | BGLY 184 |    | 0.00   | 0.00  | 0.00    |
| 98      | B  | BALA 185 |    | 48.58  | 0.00  | 0.00    |
| 99      | B  | BTRY 186 |    | 38.66  | 0.00  | 0.00    |
| 100     | B  | BILE 187 |    | 0.00   | 0.00  | 0.00    |
| 101     | B  | BGLY 188 |    | 16.21  | 0.00  | 0.00    |
| 102     | B  | BLYS 189 |    | 94.85  | 0.00  | 0.00    |
| 103     | B  | BILE 190 |    | 2.68   | 0.00  | 0.00    |
| 104     | B  | BGLY 191 |    | 27.49  | 0.00  | 0.00    |
| 105     | B  | BLYS 192 |    | 62.70  | 0.00  | 0.00    |
| 106     | B  | BVAL 193 |    | 0.37   | 0.00  | 0.00    |
| 107     | B  | BARG 194 |    | 86.27  | 0.00  | 0.00    |
| 108     | B  | BVAL 195 |    | 48.13  | 0.00  | 0.00    |
| 109     | B  | BTRY 196 |    | 27.53  | 0.00  | 0.00    |
| 110     | B  | BARG 197 |    | 77.57  | 0.00  | 0.00    |
| 111     | B  | BASN 198 |    | 8.55   | 0.00  | 0.00    |
| 112     | B  | BASP 199 |    | 132.50 | 0.00  | 0.00    |
| 113     | B  | BARG 200 |    | 150.63 | 0.00  | 0.00    |
| 114     | B  | BARG 201 |    | 118.51 | 0.00  | 0.00    |
| 115     | B  | BGLY 202 |    | 41.83  | 0.00  | 0.00    |
| 116     | B  | BGLY 203 |    | 2.15   | 0.00  | 0.00    |
| 117     | B  | BILE 204 |    | 50.57  | 0.00  | 0.00    |
| 118     | B  | BMET 205 |    | 4.34   | 0.00  | 0.00    |
| 119     | B  | BARG 206 |    | 78.03  | 0.00  | 0.00    |
| 120     | B  | BSER 207 |    | 0.00   | 0.00  | 0.00    |
| 121     | B  | BARG 208 |    | 1.51   | 0.00  | 0.00    |
| 122     | B  | BVAL 209 |    | 2.15   | 0.00  | 0.00    |
| 123     | B  | BARG 210 |    | 100.38 | 0.00  | 0.00    |
| 124     | B  | BGLY 211 |    | 0.00   | 0.00  | 0.00    |
| 125     | B  | BALA 212 |    | 1.33   | 0.00  | 0.00    |
| 126     | B  | BALA 213 |    | 82.03  | 0.00  | 0.00    |
| 127     | B  | BALA 214 |    | 29.92  | 0.00  | 0.00    |
| 128     | B  | BALA 215 |    | 6.99   | 0.00  | 0.00    |
| 129     | B  | BGLM 216 |    | 123.24 | 0.00  | 0.00    |
| 130     | B  | BALA 217 |    | 12.80  | 0.00  | 0.00    |
| 131     | B  | BTRY 218 |    | 134.64 | 0.00  | 0.00    |
| 132     | B  | BVAL 219 |    | 4.02   | 0.00  | 0.00    |
| 133     | B  | BILE 220 |    | 0.17   | 0.00  | 0.00    |
| 134     | B  | BTRY 221 |    | 1.33   | 0.00  | 0.00    |
| 135     | B  | BPHE 222 |    | 0.00   | 0.00  | 0.00    |
| 136     | B  | BVAL 223 |    | 2.51   | 0.00  | 0.00    |
| 137     | B  | BASP 224 |    | 24.41  | 0.00  | 0.00    |
| 138     | B  | BSER 225 |    | 0.13   | 0.00  | 0.00    |
| 139     | B  | BHIS 226 |    | 41.13  | 0.00  | 0.00    |
| 140     | B  | BICY 227 |    | 1.25   | 0.00  | 0.00    |
| 141     | B  | BGLY 228 |    | 8.65   | 0.00  | 0.00    |
| 142     | B  | BICY 229 |    | 0.57   | 0.00  | 0.00    |
| 143     | B  | BASN 230 |    | 0.49   | 0.00  | 0.00    |
| 144     | B  | BGLY 231 |    | 68.00  | 0.00  | 0.00    |
| 145     | B  | BHIS 232 |    | 75.45  | 0.00  | 0.00    |
| 146     | B  | BTRP 233 |    | 0.62   | 0.00  | 0.00    |
| 147     | B  | BTRY 234 |    | 0.00   | 0.00  | 0.00    |
| 148     | B  | BGLM 235 |    | 8.39   | 0.00  | 0.00    |
| 149     | B  | BPRO 236 |    | 2.54   | 0.00  | 0.00    |
| 150     | B  | BILE 237 |    | 1.33   | 0.00  | 0.00    |
| 151     | B  | BTRY 238 |    | 0.00   | 0.00  | 0.00    |
| 152     | B  | BTRY 239 |    | 41.91  | 0.00  | 0.00    |
| 153     | B  | BARG 240 |    | 41.78  | 0.00  | 0.00    |
| 154     | B  | BVAL 241 |    | 4.78   | 0.00  | 0.00    |
| 155     | B  | BALA 242 |    | 28.33  | 0.00  | 0.00    |
| 156     | B  | BGLM 243 |    | 114.98 | 0.00  | 0.00    |
| 157     | B  | BASP 244 |    | 50.54  | 0.00  | 0.00    |
| 158     | B  | BARG 245 |    | 126.34 | 0.00  | 0.00    |
| 159     | B  | BTRY 246 |    | 48.25  | 0.00  | 0.00    |
| 160     | B  | BTRY 247 |    | 41.37  | 0.00  | 0.00    |
| 161     | B  | BVAL 248 |    | 0.12   | 0.00  | 0.00    |
| 162     | B  | BVAL 249 |    | 0.00   | 0.00  | 0.00    |
| 163     | B  | BSER 250 |    | 9.74   | 0.00  | 0.00    |
| 164     | B  | BPRO 251 |    | 6.19   | 0.00  | 0.00    |
| 165     | B  | BILE 252 |    | 8.05   | 0.00  | 0.00    |
| 166     | B  | BILE 253 |    | 6.83   | 0.00  | 0.00    |
| 167     | B  | BASP 254 |    | 0.00   | 0.00  | 0.00    |
| 168     | I  | BVAL 255 |    | 39.13  | 30.09 | 0.48    |
| 169     | B  | BILE 256 |    | 0.90   | 0.00  | 0.00    |
| 170     | I  | BVAL 257 |    | 41.12  | 21.63 | -0.33   |
| 171     | B  | BMET 258 |    | 40.47  | 0.00  | 0.00    |
| 172     | B  | BASP 259 |    | 85.09  | 0.00  | 0.00    |
| 173     | B  | BASN 260 |    | 81.66  | 8.59  | -0.10   |
| 174     | B  | BPHE 261 |    | 1.52   | 0.00  | 0.00    |
| 175     | I  | BGLM 262 | H  | 105.93 | 59.70 | -0.70   |
| 176     | I  | BVAL 263 | H  | 7.42   | 3.81  | -0.04   |
| 177     | I  | BTRY 264 |    | 62.33  | 60.49 | 0.97    |
| 178     | I  | BVAL 265 | H  | 37.73  | 34.38 | -0.17   |
| 179     | I  | BALA 266 |    | 23.08  | 16.24 | 0.16    |
| 180     | I  | BSER 267 | H  | 62.68  | 51.73 | 0.33    |
| 181     | I  | BALA 268 | H  | 20.44  | 9.07  | 0.03    |
| 182     | I  | BASP 269 | H  | 80.36  | 44.79 | -0.20   |
| 183     | I  | BTRY 270 |    | 41.53  | 34.96 | 0.56    |
| 184     | B  | BGLY 271 |    | 5.27   | 0.00  | 0.00    |
| 185     | B  | BGLY 272 |    | 0.00   | 0.00  | 0.00    |
| 186     | B  | BGLY 273 |    | 0.00   | 0.00  | 0.00    |
| 187     | B  | BPHE 274 |    | 0.00   | 0.00  | 0.00    |
| 188     | B  | BTRY 275 |    | 51.54  | 0.00  | 0.00    |
| 189     | B  | BTRP 276 |    | 9.16   | 0.00  | 0.00    |
| 190     | B  | BASN 277 |    | 50.07  | 0.00  | 0.00    |
| 191     | B  | BTRY 278 |    | 10.72  | 0.00  | 0.00    |
| 192     | B  | BTRY 279 |    | 37.05  | 0.00  | 0.00    |
| 193     | B  | BPHE 280 |    | 30.06  | 0.00  | 0.00    |
| 194     | B  | BTRY 281 |    | 50.64  | 0.00  | 0.00    |
| 195     | B  | BTRY 282 |    | 77.29  | 30.30 | 0.36    |
| 196     | B  | BASP 283 |    | 25.92  | 0.00  | 0.00    |
| 197     | I  | BTRY 284 | H  | 184.16 | 75.39 | 0.13    |
| 198     | B  | BTRY 285 |    | 21.28  | 0.00  | 0.00    |
| 199     | B  | BTRY 286 |    | 39.05  | 0.00  | 0.00    |
| 200     | I  | BTRY 287 |    | 79.01  | 8.71  | 0.14    |
| 201     | B  | BGLM 288 |    | 112.44 | 2.19  | -0.04   |
| 202     | B  | BGLM 289 |    | 29.96  | 0.00  | 0.00    |
| 203     | I  | BARG 290 |    | 140.21 | 40.94 | -0.21   |
| 204     | B  | BARG 291 |    | 137.99 | 2.03  | -0.02   |
| 205     | B  | BTRY 292 |    | 62.62  | 0.00  | 0.00    |
| 206     | B  | BARG 293 |    | 19.49  | 0.00  | 0.00    |
| 207     | B  | BGLM 294 |    | 147.07 | 0.00  | 0.00    |
| 208     | B  | BGLY 295 |    | 68.01  | 0.00  | 0.00    |
| 209     | B  | BASN 296 |    | 59.21  | 0.00  | 0.00    |
| 210     | B  | BPRO 297 |    |        |       |         |
